# Supplementary material for: Assessment of Fire Safety Management for Special Needs Schools in South Africa
Source: MDPI journal article supplement (doi:10.3390/safety10020043), 2024-04-30
Supplement: s1 [file s1]

## QUESTIONNAIRE TO ASSESS FIRE SAFETY MANAGEMENT FOR SELECTED SPECIAL NEEDS SCHOOLS IN THE NORTHWEST PROVINCE OF SOUTH AFRICA

**Please take note of the following:**

- You are free to skip questions that you are not comfortable with;
- You are free to discontinue/withdraw from the study at any time;
- There is no reimbursement for participating in this study;
- The questionnaire will not take more than 30 minutes of your time.

### SECTION A: DEMOGRAPHIC INFORMATION

Please indicate your answer with an [X]

#### 1. Gender

|                   |  |
|-------------------|--|
| Female            |  |
| Male              |  |
| LGBTQIA+          |  |
| Prefer not to say |  |

#### 2. Marital status

|                   |  |
|-------------------|--|
| Single            |  |
| Married           |  |
| Widowed           |  |
| Divorced          |  |
| Separated         |  |
| Prefer not to say |  |

#### 3. Age

|           |  |
|-----------|--|
| 18-25yrs  |  |
| 26-35yrs  |  |
| 36-45 yrs |  |
| 46-55yrs  |  |

|                   |  |
|-------------------|--|
| 56-65 yrs         |  |
| 66+ yrs           |  |
| Prefer not to say |  |

#### 4. Employment Status

|                      |  |
|----------------------|--|
| Permanently employed |  |
| Temporary employed   |  |

#### 5. Educational Level

|                     |  |
|---------------------|--|
| No Schooling        |  |
| Primary Schooling   |  |
| Secondary Schooling |  |
| ABET                |  |
| Tertiary Education  |  |
| Prefer not to say   |  |

### SECTION B: FIRE ROOT CAUSES AND EXISTING FIRE SAFETY MANAGEMENT

6. In general, does your school have limited access to the following: Please answer yes/no /not sure

|                 | Yes | No | Not sure | Prefer not to say |
|-----------------|-----|----|----------|-------------------|
| 21.1. Power     |     |    |          |                   |
| 21.2. Structure |     |    |          |                   |

|                        |  |  |  |  |
|------------------------|--|--|--|--|
| 21.3. Resources        |  |  |  |  |
| <b>Ideologies</b>      |  |  |  |  |
| 21.4. political system |  |  |  |  |
| 21.5. economic system  |  |  |  |  |
| 21.6. Social System    |  |  |  |  |

7. Does your school have fire safety management programs?

|                |  |
|----------------|--|
| Yes            |  |
| No             |  |
| Not sure       |  |
| Not Applicable |  |

8. If you answered yes above, please select which fire safety program does your school have below. Select with an [X] and you are allowed to choose more than one program.

|                               |  |
|-------------------------------|--|
| Fire Safety Training Programs |  |
| Fire Drills                   |  |
| Fire Incident Planning        |  |
| Fire Protection               |  |
| Fire Fighting                 |  |
| Any other, please specify:    |  |

9. On a scale of 1 to 5 where 1 is “not involved at all” and 5 is “extremely involved” please rate the following statements:

|                                                                                                         | 1:<br>Not<br>involved at<br>all | 2:<br>sometimes<br>involved | 3:<br>somewhat<br>involved | 4:<br>moderately<br>involved | 5:<br>extremely<br>involved |
|---------------------------------------------------------------------------------------------------------|---------------------------------|-----------------------------|----------------------------|------------------------------|-----------------------------|
| 24.1. To what extent are is your school management and stakeholders involved in fire safety programmes? |                                 |                             |                            |                              |                             |

|                                                                                                                     |  |  |  |  |  |
|---------------------------------------------------------------------------------------------------------------------|--|--|--|--|--|
| 24.2. To what extent is your school management and stakeholders involved in physical school fire safety programmes? |  |  |  |  |  |
| 24.3. To what extent are learners in your school involved fire safety programmes?                                   |  |  |  |  |  |

10. Does your School have fire safety management programs ?

11. Are you awareness of the existence of safety policies in your schools?

12. Are you awareness of the existence of the recruitment of fire safety officers or a school safety committee in their schools?

### SECTION C: Fire safety legislation and policies

13. Do you use any form of chemicals in your School?

|     |  |
|-----|--|
| Yes |  |
| No  |  |
| n/a |  |

14. Does your school have protocols for handling flammables?

|     |  |
|-----|--|
| Yes |  |
| No  |  |
| n/a |  |

15. Does your school store flammables in purpose-made storage?

|     |  |
|-----|--|
| Yes |  |
| No  |  |
| n/a |  |

16. Are hazardous substances in your school stores registered with local fire services?

|     |  |
|-----|--|
| Yes |  |
| No  |  |
| n/a |  |

17. Is gas used at any given point in your school premises?

|     |  |
|-----|--|
| Yes |  |
| No  |  |
| n/a |  |

18. If you answered yes above, please report if there is a certificate of conformity for the gas installation or appliances

.....

19. Is gas usage registered with the local fire services?

|     |  |
|-----|--|
| Yes |  |
| No  |  |
| n/a |  |

20. Do you know if there is electrical compliance certificates in your School?

|     |  |
|-----|--|
| Yes |  |
| No  |  |
| n/a |  |

21. Does your school lock classroom doors when vacant?

|     |  |
|-----|--|
| Yes |  |
| No  |  |
| n/a |  |

22. Are your school access gates secured after hours?

|     |  |
|-----|--|
| Yes |  |
| No  |  |
| n/a |  |

23. In which capacity did you answer the above question?

|                                     |  |
|-------------------------------------|--|
| Educator                            |  |
| Member of the School Governing body |  |
